# Supplementary material
Source: PubMed Central journal article supplement (PMC3321859)
Supplement: supp_blood-2011-09-379339_blood-2011-09-379339-1.pdf [file supp_blood-2011-09-379339_blood-2011-09-379339-1.pdf]

**Table S1. Characteristics of 69 HCL patients and BRAF mutation test results**

| PT No. | Dx   | % of HCL | VH         | Sex | Age at Dx | BRAF c.1799T>A (V600E) | BRAF c.1799T>A (AQ%) |
|--------|------|----------|------------|-----|-----------|------------------------|----------------------|
| BN30   | HCL  | 95.0     | VH1-18     | M   | 37        | Pos                    | 83.5                 |
| BL47   | HCL  | 94.1     | VH3-7      | M   | 50        | Pos                    | 95.4                 |
| BL46   | HCL  | 92.2     | VH4-39     | M   | 44        | Pos                    | 72.0                 |
| BH05   | HCL  | 91.1     | VH3-30     | M   | 50        | Pos                    | 30.7                 |
| L235   | HCL  | 90.6     | VH1-2      | M   | 56        | Pos                    | 87.2                 |
| HH31   | HCL  | 88.3     | VH3-21     | M   | 55        | Pos                    | 84.0                 |
| RC08   | HCL  | 85.5     | VH3-30     | F   | 49        | Pos                    | 45.5                 |
| HH20   | HCL  | 82.2     | VH3-23     | M   | 72        | Pos                    | 72.5                 |
| BN19   | HCL  | 80.6     | VH3-30     | M   | 51        | Pos                    | 54.0                 |
| BH21   | HCL  | 77.4     | VH5-51     | M   | 44        | Pos                    | 42.6                 |
| BH31   | HCL  | 77.0     | VH3-33     | M   | 64        | Pos                    | 73.8                 |
| HH27   | HCL  | 74.4     | VH3-h      | M   | 49        | Pos                    | 54.4                 |
| HH38   | HCL  | 74.0     | VH3-21     | M   | 58        | Pos                    | 40.7                 |
| RB09   | HCL  | 64.7     | VH3-33     | M   | 44        | Pos                    | 37.3                 |
| RD09   | HCL  | 64.6     | VH3-30     | M   | 45        | Pos                    | 42.9                 |
| HH22   | HCL  | 61.4     | VH3-23     | M   | 60        | Pos                    | 35.0                 |
| BH10   | HCL  | 59.6     | VH3-23     | M   | 42        | Pos                    | 60.8                 |
| BL25   | HCL  | 58.1     | VH4-39     | M   | 39        | Pos                    | 46.6                 |
| RC03   | HCL  | 50.6     | VH4-39     | M   | 42        | Pos                    | 31.3                 |
| RC06   | HCL  | 47.3     | VH4-31     | M   | 44        | Pos                    | 35.6                 |
| RC11   | HCL  | 41.2     | Unk        | M   | 56        | Pos                    | 27.0                 |
| BN43   | HCL  | 40.0     | VH4-59     | F   | 38        | Pos                    | 64.6                 |
| BL49   | HCL  | 39.4     | VH1-2/3-74 | M   | 61        | Pos                    | 35.8                 |
| BL43   | HCL  | 37.0     | VH3-11     | M   | 59        | Pos                    | 66.9                 |
| BH02   | HCL  | 35.0     | VH1-3      | M   | 62        | Pos                    | 41.5                 |
| BL38   | HCL  | 33.8     | VH4-39     | M   | 41        | Pos                    | 36.9                 |
| HH08   | HCL  | 33.6     | VH2-26     | M   | 61        | Pos                    | 36.0                 |
| BL29   | HCL  | 32.0     | VH3-33     | M   | 41        | Pos                    | 59.3                 |
| RD14   | HCL  | 28.2     | VH3-53     | F   | 58        | Pos                    | 30.5                 |
| BH03   | HCL  | 26.6     | VH3-23     | M   | 45        | Pos                    | 31.0                 |
| RC09   | HCL  | 22.0     | VH3-9      | M   | 55        | Pos                    | 23.0                 |
| HH16   | HCL  | 21.2     | VH3-13     | M   | 51        | Pos                    | 16.2                 |
| BH12   | HCL  | 17.9     | VH3-7      | M   | 50        | Pos                    | 18.4                 |
| BL44   | HCL  | 16.8     | VH3-30     | F   | 43        | Pos                    | 26.5                 |
| RC05   | HCL  | 16.4     | VH3-30     | M   | 42        | Pos                    | 17.4                 |
| HC05   | HCL  | 16.0     | VH1-69     | M   | 37        | Pos                    | 12.4                 |
| HH04   | HCL  | 15.6     | Unk        | M   | 56        | Pos                    | 22.4                 |
| HH40   | HCL  | 12.6     | VH3-74     | M   | 61        | Pos                    | 11.0                 |
| RD13   | HCL  | 12.5     | Unk        | M   | 59        | Pos                    | 12.0                 |
| HH30   | HCL  | 11.8     | VH1-69     | M   | 38        | Pos                    | 11.2                 |
| BH17   | HCL  | 11.0     | Unk        | M   | 56        | Pos                    | 7.9                  |
| RD03   | HCL  | 10.7     | Unk        | M   | 47        | Pos                    | 8.3*                 |
| RB07   | HCL  | 59.0     | VH3-48     | M   | 37        | Neg                    | 3.2                  |
| RB04   | HCL  | 42.7     | VH3-23     | M   | 62        | Neg                    | 4.0                  |
| RC04   | HCL  | 28.5     | VH3-15     | M   | 47        | Neg                    | 6.7                  |
| BL15   | HCL  | 19.4     | Unk        | M   | 35        | Neg                    | 3.3                  |
| RD15   | HCL  | 19.1     | VH2-70     | M   | 34        | Neg                    | 6.7                  |
| BN52   | HCL  | 19.0     | VH4-39     | M   | 56        | Neg                    | 4.5                  |
| BH18   | HCL  | 92.6     | VH4-34     | M   | 61        | Neg                    | 3.8                  |
| HC08   | HCL  | 90.5     | VH4-34     | M   | 72        | Neg                    | 3.0                  |
| BL42   | HCL  | 77.8     | VH4-34     | M   | 84        | Neg                    | 3.5                  |
| HH14   | HCL  | 12.9     | VH4-34     | M   | 54        | Neg                    | 3.4                  |
| BH34   | HCL  | 12.5     | VH4-34     | M   | 60        | Neg                    | 3.1                  |
| RG06   | HCLv | 63.5     | VH4-34     | F   | 59        | Neg                    | 3.5                  |
| RG05   | HCLv | 59.2     | VH4-34     | F   | 57        | Neg                    | 3.3                  |
| BL18   | HCLv | 52.0     | VH4-34     | M   | 73        | Neg                    | 5.3                  |
| BH29   | HCLv | 48.5     | VH4-34     | M   | 59        | Neg                    | 2.6                  |
| BL26   | HCLv | 34.6     | VH4-34     | M   | 59        | Neg                    | 3.1                  |
| BH16   | HCLv | 24.4     | VH4-34     | M   | 56        | Neg                    | 3.9                  |
| BH28   | HCLv | 21.5     | VH4-34     | M   | 46        | Neg                    | 3.3                  |
| RG04   | HCLv | 12.9     | VH4-34     | M   | 78        | Neg                    | 3.4                  |
| BL14   | HCLv | 80.5     | VH4-31     | M   | 42        | Neg                    | 3.0                  |
| RG01   | HCLv | 73.1     | VH6-1      | M   | 41        | Neg                    | 3.3                  |
| BN42   | HCLv | 70.3     | VH3-15     | M   | 72        | Neg                    | 3.8                  |
| HH10   | HCLv | 48.9     | VH1-18     | M   | 44        | Neg                    | 3.2                  |
| RG08   | HCLv | 42.0     | VH1-69     | M   | 73        | Neg                    | 4.3                  |
| RG07   | HCLv | 41.0     | VH3-30     | M   | 84        | Neg                    | 3.6                  |
| BN16   | HCLv | 24.1     | VH4-31     | M   | 67        | Neg                    | 2.8                  |
| RG03   | HCLv | 21.1     | VH3-9      | F   | 53        | Neg                    | 4.0                  |

\* CD11c sorted cells was available and confirmed positive for BRAF V600E

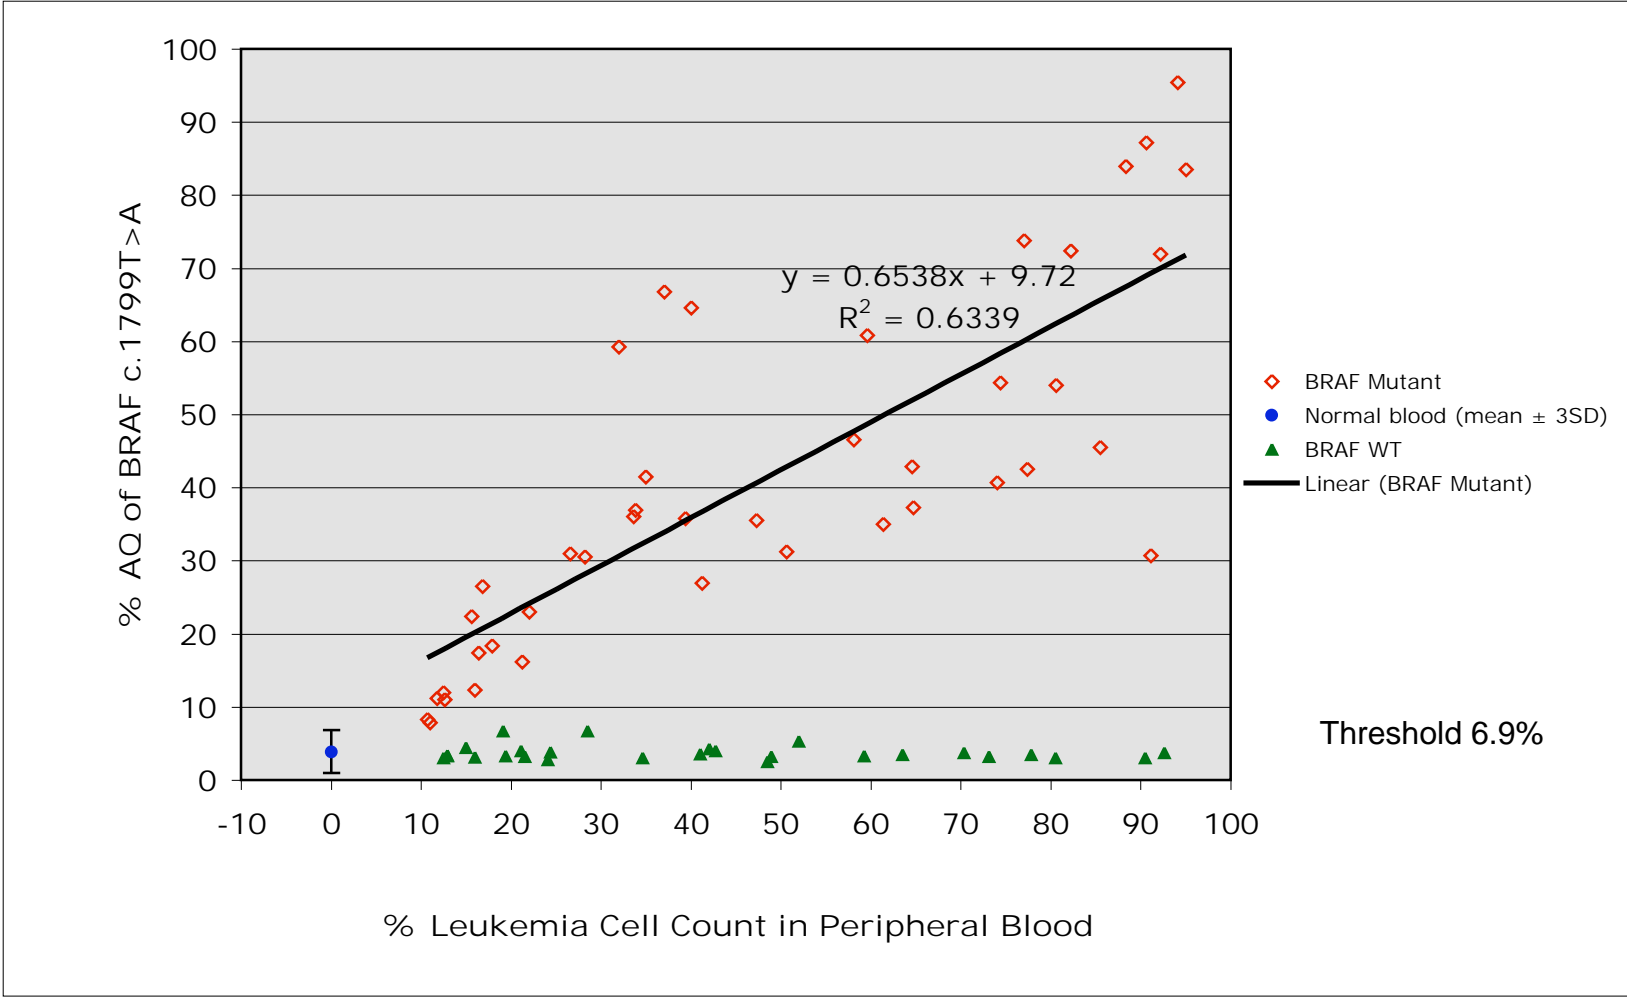

**Figure S1. Correlation of BRAF mutant allele quantification (AQ) with leukemia cell count (% WBC) in 42 BRAF mutant cases, 27 BRAF wild-type cases, and 24 normal peripheral blood controls**
